# Supplementary material for: 7Li in situ 1D NMR imaging of a lithium ion battery
Source: Royal Society of Chemistry journal article supplement (doi:10.1039/c4cp05021e), 2015-01-01
Supplement: c4cp05021e1.pdf [file c4cp05021e1.pdf]

Electronic Supplementary Information (ESI)

PFG diffusion measurements:  $^7\text{Li}$ ,  $^1\text{H}$ ,  $^{19}\text{F}$

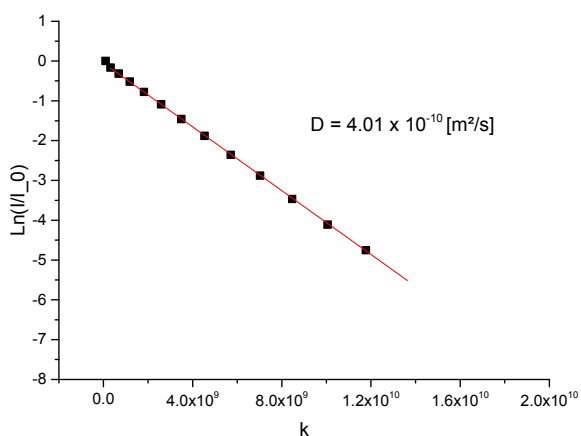

Fig. S1:  $^1\text{H}$  Diffusion NMR experiment of the electrolyte mixture without separator.

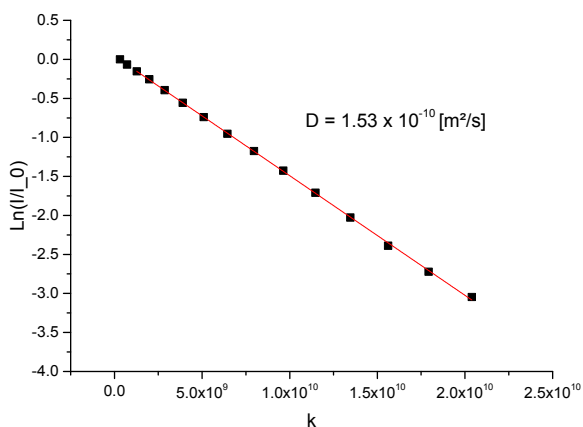

Fig. S2:  $^7\text{Li}$  Diffusion NMR experiment of the electrolyte mixture without separator.

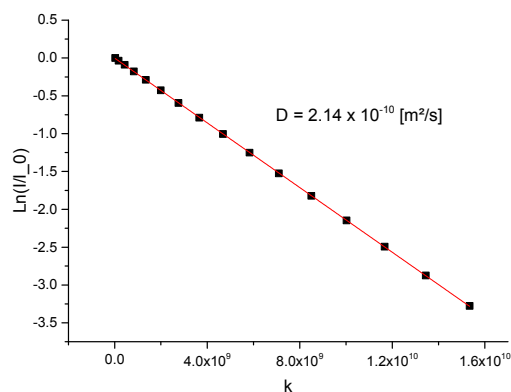

Fig. S3:  $^{19}\text{F}$  Diffusion NMR experiment of the electrolyte mixture without separator.

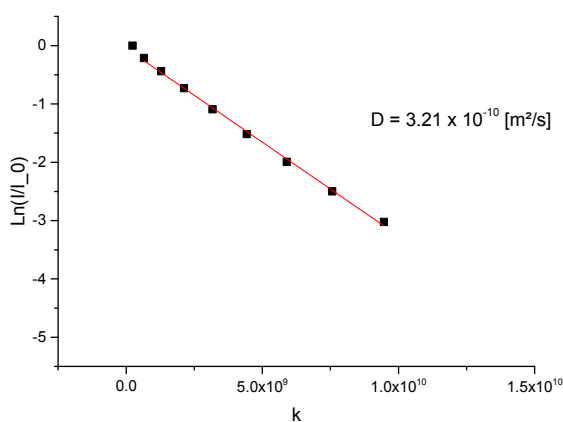

Fig. S4:  $^1\text{H}$  Diffusion NMR experiment of electrolyte mixture soaked within Whatman<sup>®</sup> GF/D separators.

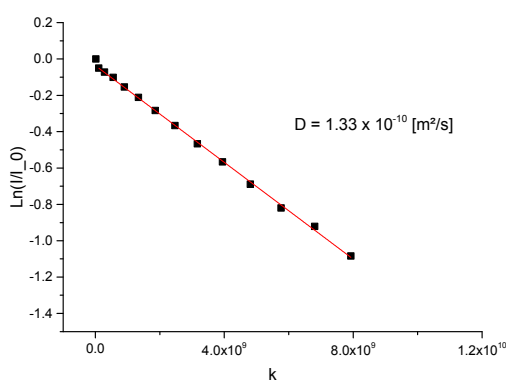

Fig. S5:  $^7\text{Li}$  Diffusion NMR experiment of the electrolyte mixture soaked within Whatman<sup>®</sup> GF/D separators.

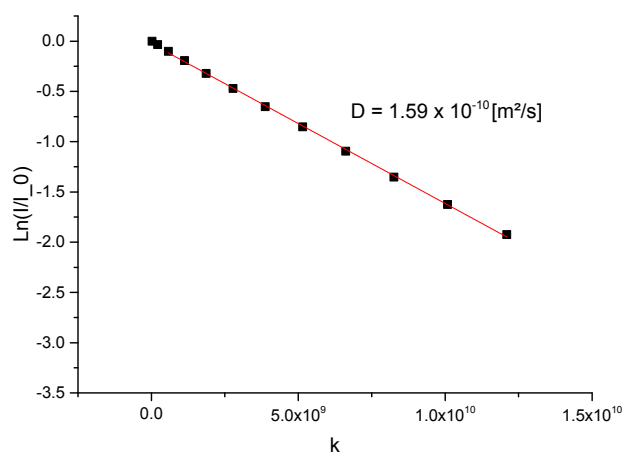

**Fig. S6:**  $^{19}\text{F}$  Diffusion NMR experiment of electrolyte mixture soaked within the Whatman® GF/D separator stack.

**Table S1:** Overview of the free diffusion constants of 1M LiDFOB in EC/DEC (3:7) + 10 wt% FEC electrolyte mixture; pure and soaked in the glass fiber separator separator measured with diffusion NMR experiments (see Figures 8-13).

|                                 | $^1\text{H}$                                    | $^7\text{Li}$                                   | $^{19}\text{F}$                                 |
|---------------------------------|-------------------------------------------------|-------------------------------------------------|-------------------------------------------------|
| <b>Electrolyte pure</b>         | $4.01 \times 10^{-10} \pm 1.22 \times 10^{-12}$ | $1.53 \times 10^{-10} \pm 7.98 \times 10^{-13}$ | $2.14 \times 10^{-10} \pm 2.12 \times 10^{-13}$ |
| <b>Electrolyte in separator</b> | $3.21 \times 10^{-10} \pm 5.58 \times 10^{-12}$ | $1.33 \times 10^{-10} \pm 1.12 \times 10^{-12}$ | $1.59 \times 10^{-10} \pm 1.25 \times 10^{-12}$ |

**1D MR Imaging pulse sequence**

;cnst2: y-gradient maximum amplitude

;cnst3: z-gradient maximum amplitude

;diffprof

;\$OWNER=nmrsl

#include&lt;Avance.incl&gt;

#include&lt;Grad.incl&gt;

#include&lt;De.incl&gt;

"cnst31=cnst1+cnst2+cnst3"

"p2 = 2\*p1"

"p3 = 3\*p1"

"p4 = p1\*cnst5"

```

1    ze
      10u pl1:f1
      d11 UNBLKGRAMP
2    d1                ;relaxation delay
      p4:f1 ph1        ;non-selective pulse
      d2 grad{(cnst1) | (cnst2) | (cnst3)}
      d18
      d2 groff
      d9
      p1:f1 ph2
      0.3u
      p3:f1 ph3
      d9
      d2 grad{(cnst1) | (cnst2) | (cnst3)}
      ACQ_START(ph30,ph31)
      aq DWELL_GEN:f1    ; start acquisition
      d2 groff
      100u
      rcyc=2
      100u
      100u wr #0
      exit

```

ph1 = 0 2 1 3 2 0 3 1

ph2 = 0

ph3 = 2

ph30 = 0

ph31 = 0 2 3 1 2 0 1 3

;pl1: f1 channel - power level for pulse (default)

;p1: f1 channel - 90 degree pulse

;d2: gradient stabilisation time

;d9: to increase the echo time

;d18: dephasing time

;cnst1: x-gradient maximum amplitude
